# Supplementary material for: Comparative Analyses of Chloroplast Genomes From 14 Zanthoxylum Species: Identification of Variable DNA Markers and Phylogenetic Relationships Within the Genus
Source: Front Plant Sci. 2021 Jan 13;11:605793. doi: 10.3389/fpls.2020.605793 (PMC7838127; doi:10.3389/fpls.2020.605793)
Supplement: Supplementary Table 2 — The number of long repeats in the whole cp genome sequence of 14 Zanthoxylum species. [file Table_2.XLSX]

## Sheet: Sheet1
Table S2.The number of long repeats in the whole cp genome sequence of 14 Zanthoxylum species
Length（bp）	30	31	32	33	34	35	36	37	38	39	40	41	42	43	44	46	48	49	54	55	73
Z.armatum	5	1	2	0	0	0	0	0	0	1	4	2	0	0	3	0	2	0	1	0	1
Z.calcicola	11	2	1	0	4	0	2	1	0	0	7	0	1	0	0	0	2	0	1	0	1
Z.motuoense	7	1	4	0	0	0	0	0	0	0	7	2	0	0	0	1	2	4	0	0	1
Z.multijugum	10	1	1	0	4	0	2	0	0	0	7	0	0	0	0	0	2	1	1	0	1
Z.oxyphyllum	6	2	1	0	4	0	2	1	0	0	7	0	0	1	0	0	2	0	1	0	1
Z.piasezkii	8	1	1	0	0	0	0	0	0	1	4	2	3	0	0	0	2	0	0	1	1
Z.bungeanum	3	1	1	0	0	0	0	0	0	1	4	2	3	0	0	0	2	0	0	1	1
Z.madagascariense	3	1	2	1	4	0	0	0	0	0	7	0	0	3	0	0	2	0	1	0	1
Z.paniculatum	4	1	2	1	5	0	2	0	0	0	7	0	1	0	0	0	2	0	0	0	1
Z.pinnatum	6	0	2	0	4	1	0	1	4	0	4	2	1	0	0	0	1	0	1	0	1
Z.piperitum	6	1	3	0	0	0	0	0	0	0	5	2	0	0	3	0	2	0	0	1	1
Z.schinifolium	10	4	3	0	8	0	0	1	2	0	7	2	0	0	0	0	2	0	5	1	1
Z.simulans	4	1	2	0	0	0	0	0	0	1	4	2	0	0	3	0	2	0	1	0	1
Z.tragodes	5	3	1	1	0	0	3	0	0	1	4	0	4	0	0	0	1	0	1	0	1
	Forward	Palindromic	Reverse	Complement	Total
Z.armatum	9	12	1	0	22
Z.calcicola	12	16	4	1	33
Z.motuoense	12	15	2	0	29
Z.multijugum	12	14	3	1	30
Z.oxyphyllum	10	15	3	0	28
Z.piasezkii	9	12	3	0	24
Z.bungeanum	8	9	0	0	17
Z.madagascariense	12	12	0	1	25
Z.paniculatum	13	12	0	1	26
Z.pinnatum	11	15	0	2	28
Z.piperitum	9	15	0	0	24
Z.schinifolium	24	21	1	1	47
Z.simulans	9	12	0	0	21
Z.tragodes	9	12	3	1	25
	159	192	20	8	379

## Sheet: Sheet2
	Z.armatum	Z.calcicola	Z.motuoense	Z.multijugum	Z.oxyphyllum	Z.piasezkii	Z.bungeanum	Z.madagascariense	Z.paniculatum	Z.pinnatum	Z.piperitum	Z.schinifolium	Z.simulans	Z.tragodes
Forward	9	12	12	12	10	9	8	12	13	11	9	24	9	9	159
Palindromic	12	16	15	14	15	12	9	12	12	15	15	21	12	12	192
Reverse	1	4	2	3	3	3	0	0	0	0	0	1	0	3	20
Complement	0	1	0	1	0	0	0	1	1	2	0	1	0	1	8
Total	22	33	29	30	28	24	17	25	26	28	24	47	21	25	379

## Sheet: Sheet3
	Forward	Palindromic	Reverse	Complement
Z.armatum	9	12	1	0
Z.calcicola	12	16	4	1
Z.motuoense	12	15	2	0
Z.multijugum	12	14	3	1
Z.oxyphyllum	10	15	3	0
Z.piasezkii	9	12	3	0
Z.bungeanum	8	9	0	0
Z.madagascariense	12	12	0	1
Z.paniculatum	13	12	0	1
Z.pinnatum	11	15	0	2
Z.piperitum	9	15	0	0
Z.schinifolium	24	21	1	1
Z.simulans	9	12	0	0
Z.tragodes	9	12	3	1
